# Supplementary material for: Mechanism of bombesin-induced tonic contraction of the porcine lower esophageal sphincter
Source: PubMed Central journal article supplement (PMC4629149; doi:10.1038/srep15879), 2015-11-02
Supplement: srep15879-s1.pdf [file srep15879-s1.pdf]

# **Mechanism of bombesin-induced tonic contraction of the porcine lower esophageal sphincter**

Ching-Chung Tsai , Li-Ching Chang, Kai-Jen Lin, Shu-Leei Tey, Yu-Tsun Su,

Ching-Wen Liu, Tong-Rong Tsai, Shih-Che Huang

**A**

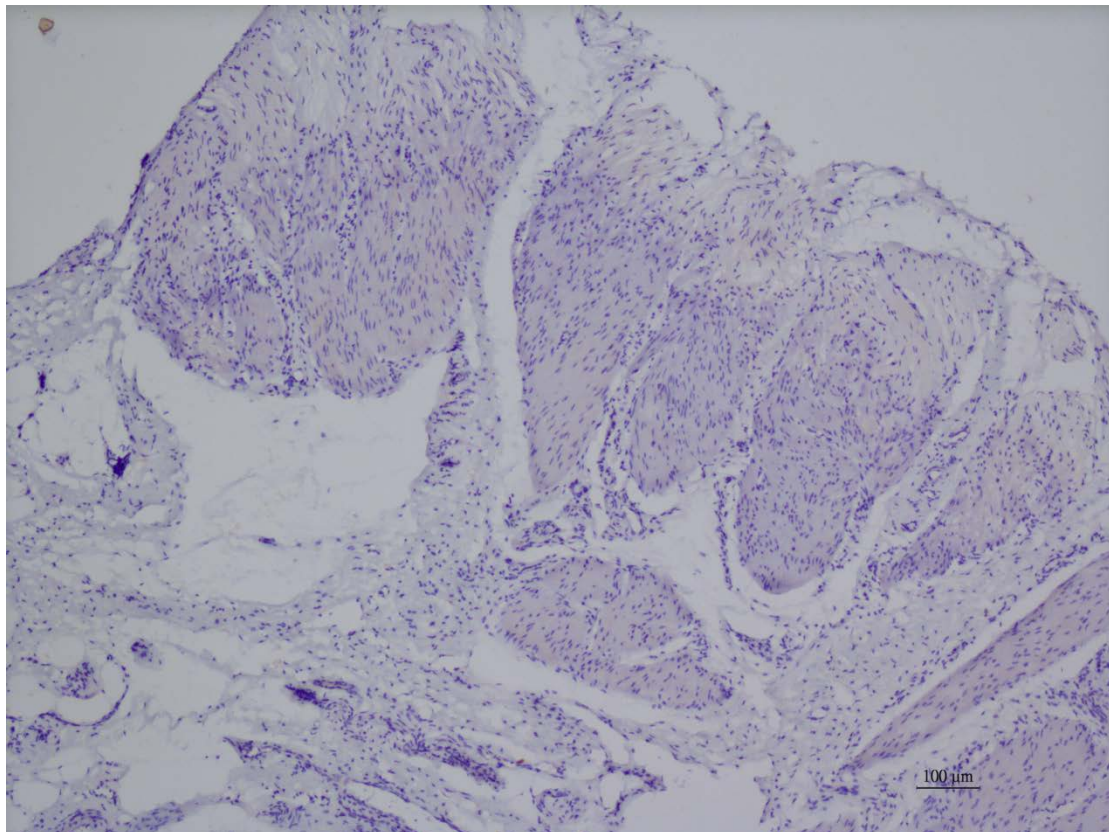

**B**

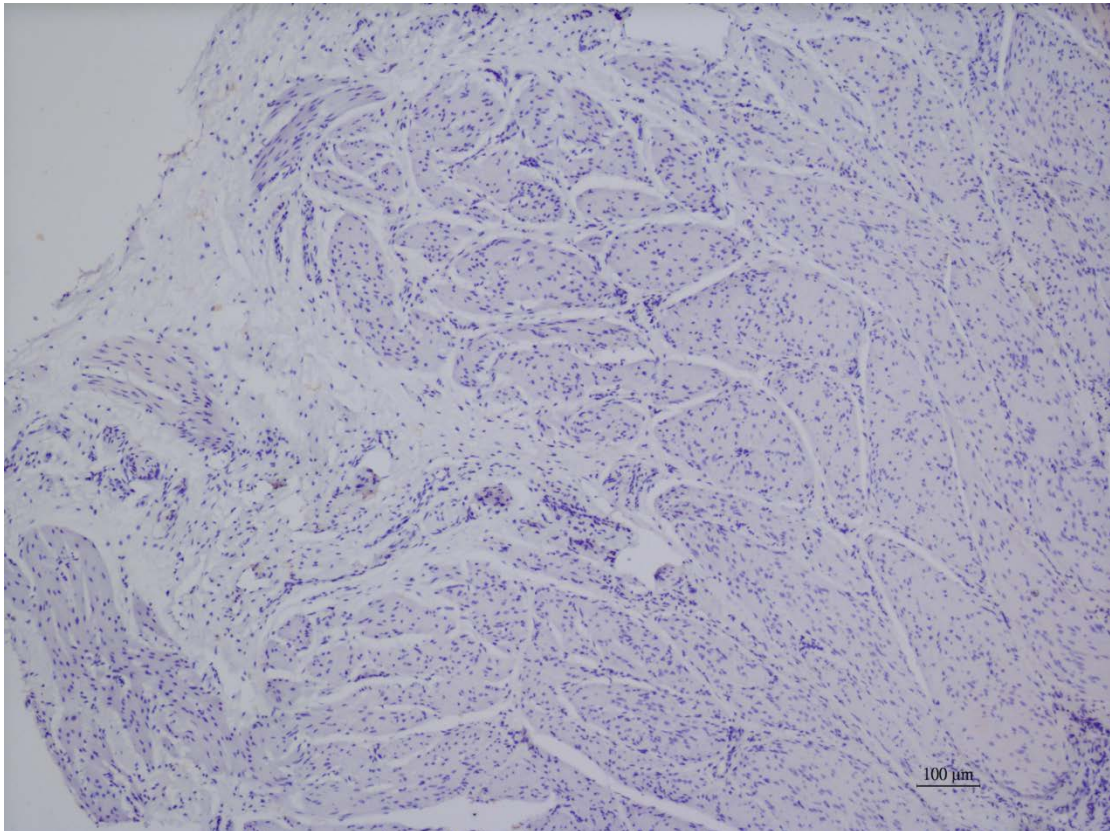

**C**

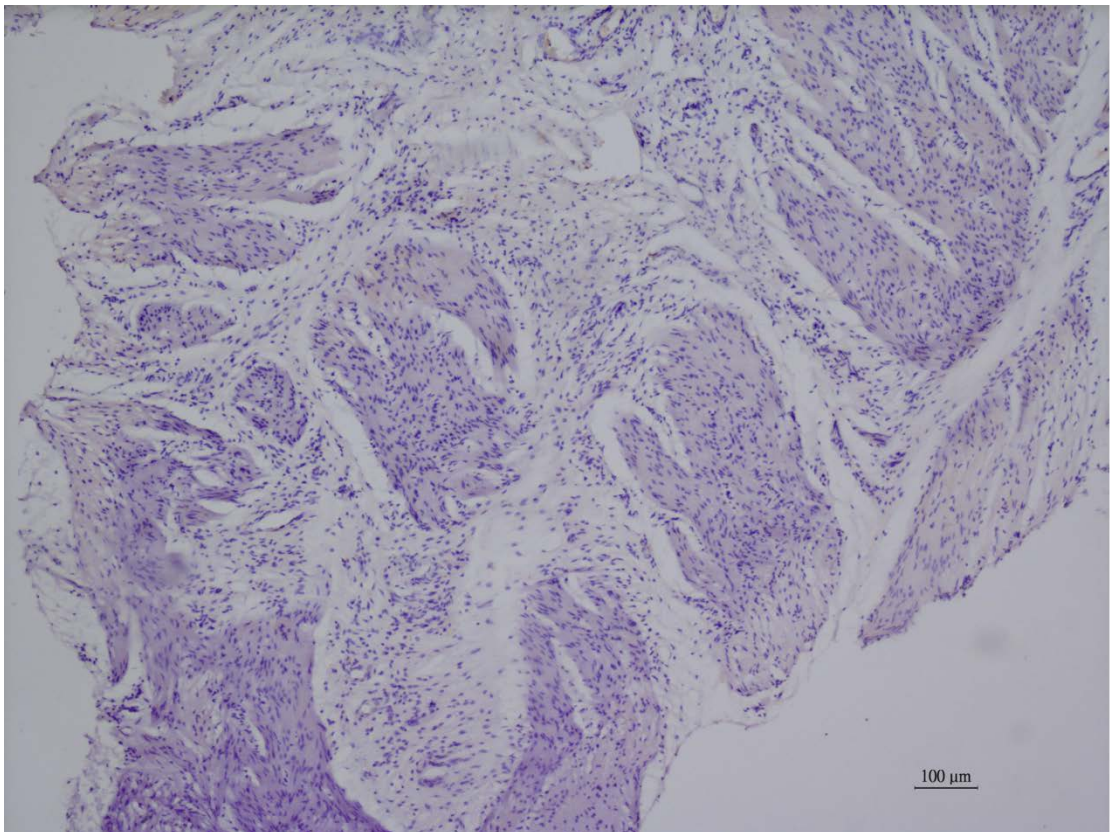

**D**

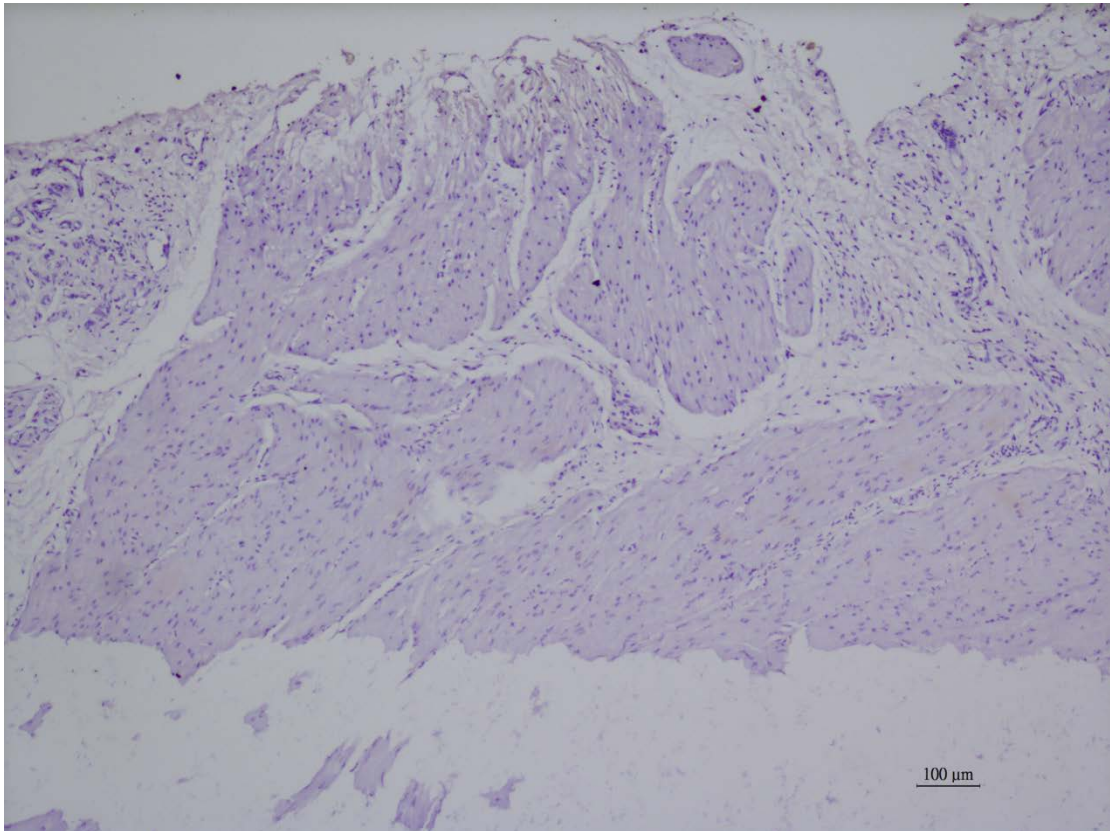

**E**

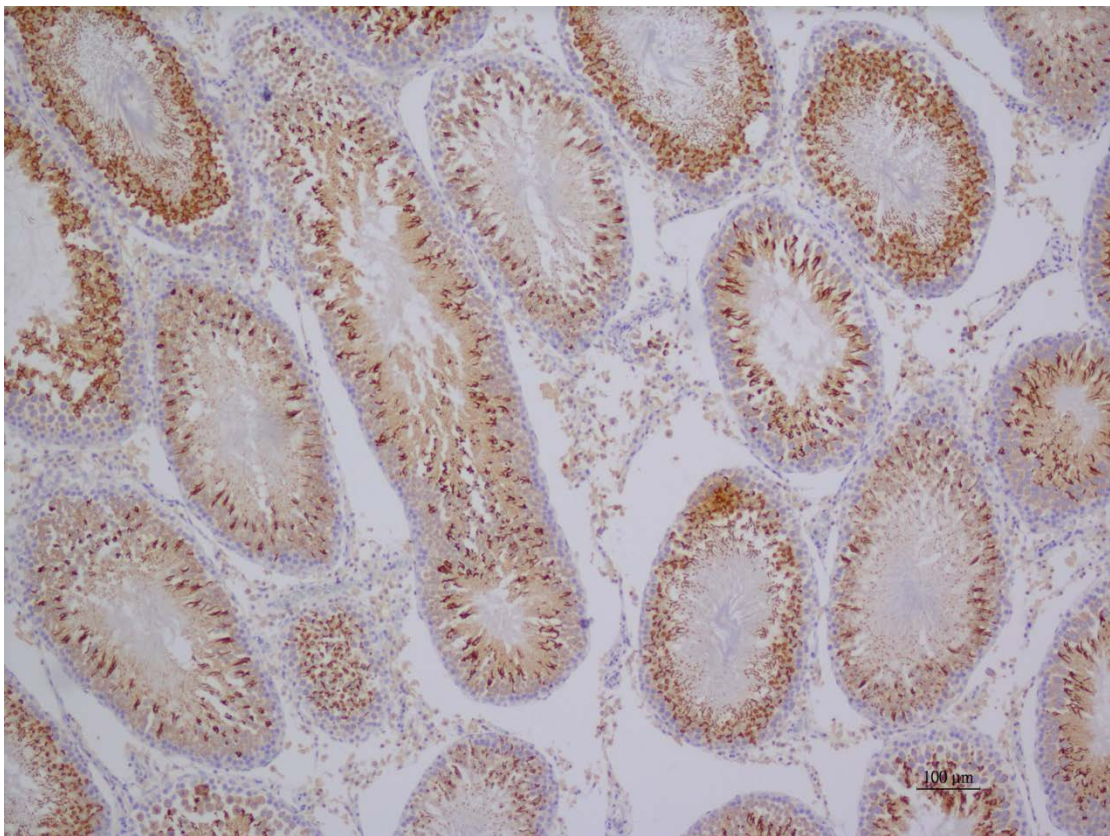

F

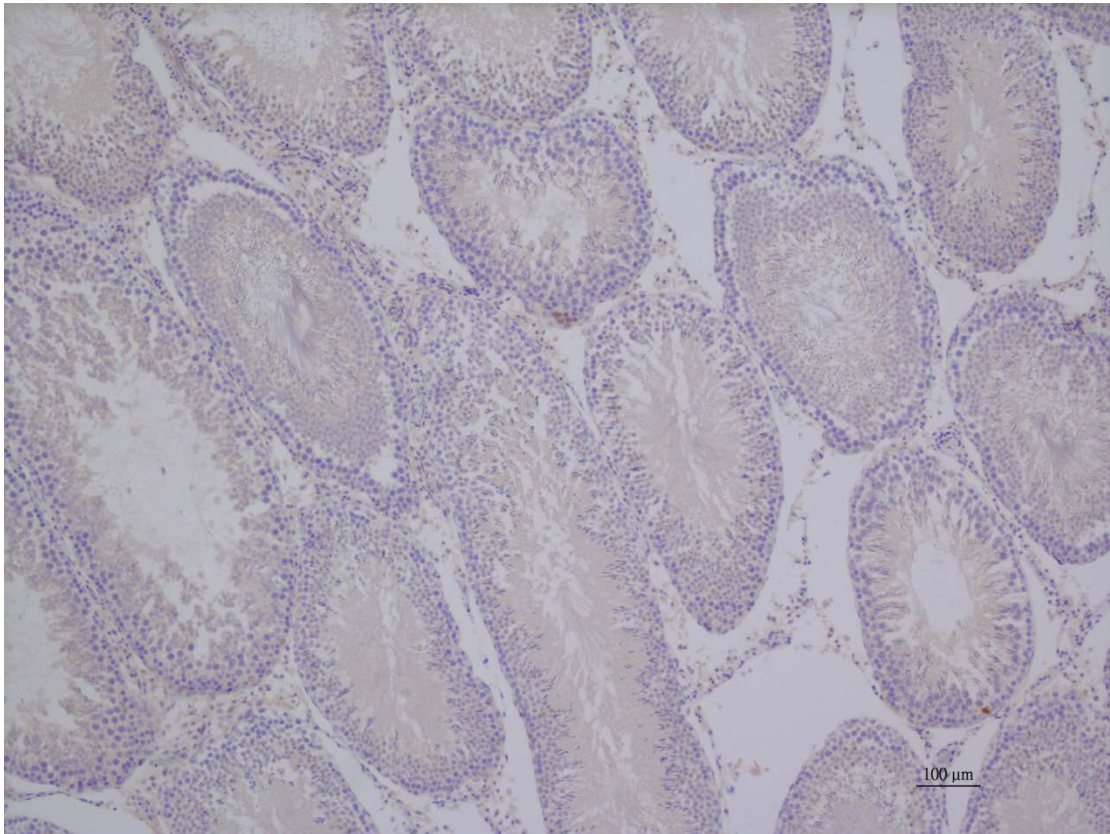

Supplementary Figure S1. Immunohistochemical analysis of the paraffin-embedded sling and clasp muscle fibers stained with a bombesin receptor subtype 1 (BB<sub>1</sub>) specific antibody and BB<sub>1</sub> immunostaining was not detected in the LES sling (A) and clasp (B) muscle strips (n = 3, magnification 100×). The tissue sections were stained with equimolar concentrations of normal rabbit IgG, which was used as a negative control for the sling (C) and clasp (D) muscle staining (magnification 100×). BB<sub>1</sub> immunostaining was detected in the rat testes (E) and the sections were stained with equimolar concentrations of normal rabbit IgG, which was used as a negative control for rat testes (F) (magnification 100×).
